# Supplementary material
Source: PubMed Central journal article supplement (PMC2777125)
Supplement: blood-2008-12-196311_1.pdf [file blood-2008-12-196311_1.pdf]

| Gene        | Forward Primer           | Reverse Primer          | Source                              |
|-------------|--------------------------|-------------------------|-------------------------------------|
| β3 Integrin | CCACACGAGGCGTGAAGCTC     | CTTCAGGTTACATCGGGGTGA   | Primerbank 7949057a1                |
| Bmi-1       | ATCCCCACTTAATGTGTGTCCT   | CTTGCTGGTCTCCAAGTAACG   | Primerbank 192203a1                 |
| Cathepsin K | GAAGAAGACTCACCAGAAGCAG   | TCCAGGTTATGGGCAGAGATT   | Primerbank 31982433a1               |
| Fit3-L      | AGATGCAAACGCTTCTGGAG     | AGGTGGGAGATGTTGGTCTG    | Primer 3                            |
| GAPDH       | TGGCAAAGTGGAGATTGTTGCC   | AAGATGGTGATGGGCTTCCCG   | Ref S3                              |
| IL-7        | TGGAATTCCTCCACTGATCC     | ACCAGTGTGTTGTGTCCTTG    | Ref S4                              |
| OPG         | GGGCGTTACCTGGAGATCG      | GAGAAGAACCCATCTGGACATTT | Primerbank 31543882a2               |
| OSCAR       | CCTAGCCTCATACCCCCAG      | CAAACCGCCAGGCAGATTG     | Primerbank 18376821a3 or 28274692a3 |
| Osteocalcin | CTGACCTCACAGATCCCAAGC    | TGGTCTGATAGCTCGTCACAAG  | Primerbank 13811695a1               |
| p107        | AGCTTCAGCCACTCAAAGTGTAAG | GCTCACTTGGTGCGCTTTTT    | Ref S5                              |
| p130        | TGATGGCAAAGGTCACAAAAGA   | GGCCTGTGGCTGAGTCCTGTA   | Ref S5                              |
| p18         | CGAGCAGCACTCTGGACTAC     | AGGCTCGGCCATTCTTTAG     | Primer 3                            |
| p19         | CTTCTTCACCGGGAGCTG       | CAAAGCAACTGCTGGACTTC    | Primer 3                            |
| p21         | GTGGCCTTGTCGCTGTCTT      | GCGCTTGGAGTGATAGAAATCTG | Primerbank 6671726a3                |
| p27         | TCTCTTCGGCCCGGTCAAT      | GGGGCTTATGATTCTGAAAGTCG | Primerbank 31542372a2               |
| RANKL       | CAGCATCGCTCTGTTCCCTGTA   | CTGCGTTTTTCATGGAGTCTCA  | Primerbank 8843823a1                |
| Rb          | TGACCTGGTAATCTCATTTTCAGC | GGGTGTTTCGAGGTGAACCAT   | Primerbank 6677679a3                |
| Runx2       | TGTTCTCTGATCGCCTCAGTG    | CCTGGGATCTGTAATCTGACTCT | Primerbank 20806530a2               |
| TSLP        | CTCCCCGACAAAACATTTGCC    | GCCATTTCTGAGTACCGTCATT  | Primerbank 10946698a3               |

- Primerbank: <http://pga.mgh.harvard.edu/primerbank/>
- Primer 3: [http://biotools.umassmed.edu/bioapps/primer3\\_www.cgi](http://biotools.umassmed.edu/bioapps/primer3_www.cgi)
